# Supplementary material for: Enantioselective desymmetrization of prochiral cyclohexanone derivatives via the organocatalytic direct Aldol reaction
Source: Royal Society of Chemistry journal article supplement (doi:10.1039/b615043h), 2006-11-30
Supplement: b615043h.pdf [file b615043h.pdf]

## *Supporting Information for*

# **Enantioselective Desymmetrization of Prochiral Cyclohexanone Derivatives via the Organocatalytic Direct Aldol Reaction**

Jun Jiang, Long He, Shi-Wei Luo, Lin-Feng Cun, and Liu-Zhu Gong\*

*Hefei National Laboratory for Physical Sciences at Microscale and Department of Chemistry,  
University of Science and Technology of China, Hefei, 230026, China; Key Laboratory for  
Asymmetric Synthesis and Chirotechnology of Sichuan Province, Chengdu Institute of Organic  
Chemistry, Chinese Academy of Sciences, Chengdu, 610041, China; and Graduate School of Chinese  
Academy of Sciences, Beijing, China. E-mail: [gonglz@ustc.edu.cn](mailto:gonglz@ustc.edu.cn)*

**General Information:** Chemicals and solvents were all purchased from commercial supplies and purified by standard techniques. NMR spectra were recorded on a Bruker-300 MHz spectrometer. High-resolution mass spectra were recorded on a Bruker BIO TOF Q mass spectrometer. Infrared spectra were recorded on a Nicolet MX-1E FT-IR spectrometer. HPLC analysis was performed on Waters-Breeze (2487 Dual  $\lambda$  Absorbance Detector and 1525 Binary HPLC Pump). Chiralpak AS, AD, OJ, and OD columns were purchased from Daicel Chemical Industries, LTD.

**Typical procedure for the synthesis of 6:** *N*-CBZ-O-TBS-L-proline (379 mg, 1.0 mmol) and amine (213 mg, 1mmol) were dissolved in Dichloromethane (15 ml), The solution was cooled down to 0 °C. To the solution, DCC (250 mg, 1.2 mmol) was added. After the resulting solution was stirred at 0 °C for 1 h and at room temperature for another 16 h, the mixture was filtered. The solvent was removed under the reduced pressure and Dichloromethane (10ml) was added to the residue. The solution was stirred at 0 °C for 12h and then was filtered to remove DCC. The solvent was removed under the reduced pressure and the residue was purified through column chromatography on silica gel( eluent: Dichloromethane: Ethyl acetate= 20:1) to give Compounds **6'**. A solution of **6'** (1.0 g), Pd/C (5%, 0.1 g) in methanol (30ml) was stirred under hydrogen (1 atm) in a two-neck flask (100 ml) for 1 h. The solution was filtered. After removal of solvent, the resulting residue was purified through a column chromatography on silica gel (eluent: Dichloromethane: methanol = 100:1) to give **6**.

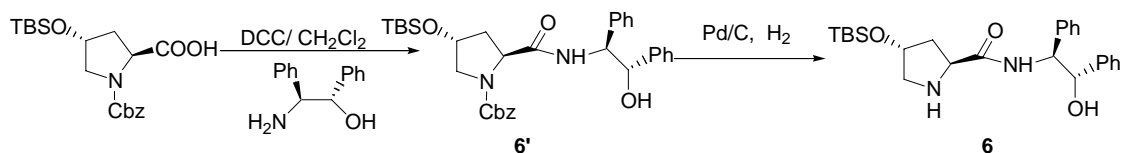

**(2S,1'S,2'S)-4-(tert-butyldimethylsiloxy)-N-(2-droxy-1,2-diphenylethyl)pyrrolidine-2-carboxamide (6):** Yield: 70% mp 57-59 °C;  $[\alpha]_D^{20} = -17.2$  (c=0.5, CH<sub>2</sub>Cl<sub>2</sub>); <sup>1</sup>H-NMR (300 MHz, CDCl<sub>3</sub>): δ (ppm) 0.03 (s, 6H), 0.85 (s, 9H), 1.71-1.78 (m, 1 H), 2.08 (m, 1H), 2.66 (m, 1H), 2.87 (m, 1H), 3.87 (t, *J* = 8.1 Hz, 1H), 4.27 (brs, 1H), 4.99 (d, *J* = 4.4 Hz, 1H), 5.01 (m, 1H), 7.18-7.31 (m, 12H), 8.57 (d, *J* = 7.6 Hz, 1H); <sup>13</sup>C-NMR (75 MHz, CDCl<sub>3</sub>): δ (ppm) -5.03, 17.81, 25.61, 39.58, 55.62, 58.87, 59.38, 73.23, 126.08, 126.81, 127.03, 127.17, 127.74, 128.09, 174.81; HR-MS for C<sub>25</sub>H<sub>37</sub>N<sub>2</sub>O<sub>3</sub>Si, calc: 441.2568, found: 441.2553.

**General procedure for the aldol reaction:** To a solution of an aldehyde (0.5 mmol) and 4-substituted cyclohexanone (5 mmol) in anhydrous Dichloromethane (2 ml) was added L-prolinamide (11 mg, 0.025 mmol). The resulting mixture was stirred at -40 °C for 72 or 96 h (monitored by TLC). The reaction was quenched with saturated aqueous ammonium chloride (10 ml). The reaction mixture was extracted with ethyl acetate and the combined organic layers were dried over anhydrous MgSO<sub>4</sub>. After removal of solvent, the residue was purified through a flash column chromatography on silica gel to give the corresponding aldol products.

**2-[Hydroxy(4-nitrophenyl)methyl]-4-methylcyclohexanone (3aa):** yield 90%;  $[\alpha]_D^{30} = -44.4$  (c=0.5, Ethyl acetate); mp: 109-111 °C; <sup>1</sup>H-NMR (300MHz, CDCl<sub>3</sub>): δ (ppm) 1.05 (d, *J* = 6.9 Hz, 3H), 1.33 (m, 1H), 1.54-1.60 (m, 1H), 1.78-1.81 (m, 1H), 1.89-1.93 (m, 1H), 2.07-2.09 (m, 1H), 2.36-2.43 (m, 1H), 2.48-2.50 (m, 1H), 2.72-2.78 (m, 1H), 3.82-3.89 (b, 1H), 4.92 (d, *J* = 8.6 Hz, 1H), 7.47-7.52 (m, 2H), 8.18-8.23 (m, 2H); <sup>13</sup>C-NMR (75 MHz, CDCl<sub>3</sub>): δ (ppm) 18.144, 26.599, 32.874, 36.031, 38.115, 52.827, 74.106, 123.627, 127.783, 147.600, 148.376, 214.887; IR(KBr) 3499, 3109, 2957, 1702, 1606, 1522, 1345, 699 cm<sup>-1</sup>; Enantiomeric excess: >99%, determined by HPLC (Daicel Chiralpak AS, i-PrOH/ Hexane = 20/ 80), UV 254 nm, flow rate 1.0 mL/min, *t*<sub>Rmajor</sub> = 11.749 min; *t*<sub>Rminor</sub> = 18.949 min; HR-MS for C<sub>14</sub>H<sub>17</sub>N<sub>1</sub>O<sub>4</sub> + Na<sup>+</sup>, calc: 286.1050, found: 286.1043.

**2-[(2-Fluorophenyl)hydroxymethyl]-4-methylcyclohexanone (3ab):** yield 93%,  $[\alpha]_D^{30} = -32.6$  (c=0.5, Ethyl acetate); mp: 81.7-82.5 °C; <sup>1</sup>H-NMR (300 MHz, CDCl<sub>3</sub>): δ (ppm) 1.05 (d, *J* = 6.9 Hz, 3H), 1.39-1.40 (m, 1H), 1.62-1.63 (m, 1H), 1.72-1.76 (m, 1H), 1.93-1.94 (m, 1H), 2.08 (m, 1H), 2.43-2.52 (m, 2H), 2.80-2.82 (m, 1H), 3.61 (bs, 1H), 5.21 (d, *J* = 9.0 Hz, 1H), 7.00-7.06 (m, 1H), 7.16-7.19 (m, 1H), 7.26-7.29 (m, 1H), 7.42-7.45 (m, 1H); <sup>13</sup>C-NMR (75 MHz, CDCl<sub>3</sub>): δ (ppm)

18.540, 26.683, 33.370, 35.883, 53.273, 68.232, 115.084 (d,  $J$  = 22.2 Hz), 124.566, 128.155, 129.273, 129.383, 158.533 (d,  $J$  = 244.3 Hz), 215.304; IR(KBr) 3397, 3109, 2928, 2868, 1689, 1615, 1585, 1044, 760  $\text{cm}^{-1}$ ; Enantiomeric excess: >99%, determined by HPLC (Daicel Chiralpak AS, i-PrOH/ Hexane= 5/95 ), UV 254 nm, flow rate 1.0 mL/min,  $t_{\text{Rmajor}}$  = 6.283 min;  $t_{\text{Rminor}}$  = 9.912 min; HR-MS for  $\text{C}_{14}\text{H}_{17}\text{F}_1\text{O}_2 + \text{Na}^+$ , calc: 259.1105, found: 259.1093.

**2-[(4-Fluorophenyl)hydroxymethyl]-4-methylcyclohexanone (3ac):** yield 76%;  $[\alpha]_{\text{D}}^{30} = -36.8$  ( $c$  = 0.5, Ethyl acetate ); mp: 91.8-93.6°C;  $^1\text{H}$ -NMR (300 MHz,  $\text{CDCl}_3$ ):  $\delta$  (ppm) 1.03 (d,  $J$  = 6.9 Hz, 3H), 1.32 (m, 1H), 1.46-1.50 (m, 1H), 1.74 (m, 1H), 1.91-1.93 (m, 1H), 2.04 (m, 1H), 2.41-2.52 (m, 2H), 2.70-2.72 (m, 1H), 4.81 (d,  $J$  = 9 Hz, 1H), 7.00-7.07 (m, 2H), 7.25-7.31 (m, 2H);  $^{13}\text{C}$ -NMR (75 MHz,  $\text{CDCl}_3$ ):  $\delta$  (ppm) 18.491, 26.671, 33.226, 36.158, 38.190, 53.495, 74.245, 115.129 (d,  $J$  = 21.3 Hz), 128.491, 128.598, 136.901, 160.796 (d,  $J$  = 244.5 Hz), 215.412; IR(KBr) 3390, 3966, 2931, 1690, 1602, 1507, 1052, 840  $\text{cm}^{-1}$ ; Enantiomeric excess: >99%, determined by HPLC (Daicel Chiralpak AS, i-PrOH/ Hexane= 30/ 70 ), UV 254 nm, flow rate 1.0 mL/min,  $t_{\text{Rmajor}}$  = 5.59 min;  $t_{\text{Rminor}}$  = 8.55 min; HR-MS for  $\text{C}_{14}\text{H}_{17}\text{F}_1\text{O}_2 + \text{Na}^+$ , calc: 259.1105, found: 259.1098.

**2-[Hydroxy(2-nitrophenyl)methyl]-4-methylcyclohexanone (3ad):** yield 84%;  $[\alpha]_{\text{D}}^{30} = +16$  ( $c$  = 0.5, Ethyl acetate ); mp. 103.5-105.7 °C;  $^1\text{H}$ -NMR (300 MHz,  $\text{CDCl}_3$ ):  $\delta$  (ppm) 1.07 (d,  $J$  = 6.9 Hz, 3H), 1.52 (m, 1H), 1.74-1.93 (m, 3H), 2.09-2.11 (m, 1H), 2.33-2.39 (m, 2H), 2.44-2.46 (m, 1H), 2.89-2.92 (m, 1H), 3.95-3.98 (b, 1H), 5.42 (d,  $J$  = 7.2 Hz, 1H), 7.40-7.45 (m, 1H), 7.62 (m, 1H); 7.72-7.74 (m, 1H); 7.81-7.84 (m, 1H);  $^{13}\text{C}$ -NMR (75 MHz,  $\text{CDCl}_3$ ):  $\delta$  (ppm) 18.172, 26.814, 33.135, 35.719, 36.601, 38.460, 52.848, 69.804, 124.038, 128.442, 128.838, 133.092, 136.686, 148.759, 214.974; IR(KBr) 3333, 3109, 2961, 2928, 2853, 1704, 1604, 1579, 1535, 1371, 848, 779  $\text{cm}^{-1}$ ; Enantiomeric excess: >99%, determined by HPLC (Daicel Chiralpak AS, i-PrOH/ Hexane= 30/70), UV 254 nm, flow rate 1.0 mL/min,  $t_{\text{Rmajor}}$  = 8.229 min;  $t_{\text{Rminor}}$  = 10.209 min; HR-MS for  $\text{C}_{14}\text{H}_{17}\text{N}_1\text{O}_4 + \text{Na}^+$ , calc: 286.1050, found: 286.1059.

**2-[Hydroxy(4-trifluoromethylphenyl)methyl]-4-methylcyclohexanone (3ae):** yield: 70%;  $[\alpha]_{\text{D}}^{30} = -35.2$  ( $c$  = 0.5, Ethyl acetate ); mp: 110.6-111.4 °C;  $^1\text{H}$ -NMR (300 MHz,  $\text{CDCl}_3$ ):  $\delta$  (ppm) 1.05 (d,  $J$  = 6.9 Hz, 3H), 1.33 (m, 1H), 1.50-1.60 (m, 1H), 1.77 (m, 1H), 1.90-1.93 (m, 1H), 2.06-2.08 (m, 1H), 2.38-2.44 (m, 1H), 2.48-2.52 (m, 1H), 2.74-2.79 (m, 1H), 3.80 (b, 1H), 4.87 (d,  $J$  = 8.7 Hz, 1H), 7.44 (d,  $J$  = 8.1 Hz, 2H), 7.61 (d,  $J$  = 8.1 Hz, 3H);  $^{13}\text{C}$ -NMR (75 MHz,  $\text{CDCl}_3$ ):  $\delta$  (ppm) 18.236, 26.617, 33.072, 36.072, 38.140, 53.024, 74.389, 118.625 (q,  $J$  = 270.3 Hz), 125.393 (q,  $J$  = 3.5 Hz), 127.278, 129.491 (q,  $J$  = 32.1 Hz), 144.972, 215.261; IR(KBr) 3363, 3045, 2959, 2913, 2875, 1694,

1455, 1322, 1182, 1168.2, 1069, 608  $\text{cm}^{-1}$ ; Enantiomeric excess: 99%, determined by HPLC (Daicel Chiralpak AS, i-PrOH/ Hexane= 30/ 70 ), UV 254 nm, flow rate 1.0 mL/min,  $t_{\text{Rmajor}}= 5.966$  min;  $t_{\text{Rminor}}= 8.184$  min; HR-MS for  $\text{C}_{15}\text{H}_{17}\text{F}_3\text{O}_2+\text{Na}^+$ , calc: 309.1073, found: 309.1083.

**4-[(Hydroxy(5-methyl-2-oxocyclohexyl)methyl)benzonitrile(3af):** yield 80%;  $[\alpha]_{\text{D}}^{30} = -51.4$  ( $c= 0.5$ , Ethyl acetate ); mp: 93.4-95.1  $^{\circ}\text{C}$ ;  $^1\text{H}$ -NMR (300MHz,  $\text{CDCl}_3$ ):  $\delta$  (ppm) 1.05 (d,  $J= 6.9$  Hz, 3H), 1.28-1.32 (m, 1H), 1.52-1.62 (m, 1H), 1.77-1.81 (m, 1H), 1.89-1.93 (m, 1H), 2.04-2.09 (m, 1H), 2.36-2.43 (m, 1H), 2.48-2.50 (m, 1H), 2.72 (m, 1H), 4.85 (d,  $J= 8.7$  Hz, 1H), 7.42-7.45 (m, 2H), 7.63-7.66 (m, 2H);  $^{13}\text{C}$ -NMR (75 MHz,  $\text{CDCl}_3$ ):  $\delta$  (ppm) 18.142, 26.610, 32.888, 36.035, 38.126, 52.755, 74.391, 111.833, 118.669, 127.696, 132.287, 146.353, 215.029; IR(KBr) 3422, 3050, 2938, 2927, 2854, 2871, 2227, 1698, 1606, 1503, 842  $\text{cm}^{-1}$ ; Enantiomeric excess: 96%, determined by HPLC (Daicel Chiralpak AS, i-PrOH/ Hexane= 30/ 70 ), UV 254 nm, flow rate 1.0 mL/min,  $t_{\text{Rmajor}}= 12.009$  min;  $t_{\text{Rminor}}= 19.724$  min; HR-MS for  $\text{C}_{15}\text{H}_{17}\text{N}_1\text{O}_2+\text{Na}^+$  calc: 266.1151; found: 266.1140.

**2-[(4-Bromo-phenyl)hydroxymethyl]-4-methylcyclohexanone (3ag):** yield 61%;  $[\alpha]_{\text{D}}^{30} = -27.4$  ( $c= 0.5$ , Ethyl acetate ); mp: 103.1-104.5  $^{\circ}\text{C}$ ;  $^1\text{H}$ -NMR (300 MHz,  $\text{CDCl}_3$ ):  $\delta$  (ppm) 1.02 (d,  $J= 6.9$  Hz, 3H), 1.29-1.31 (m, 1H), 1.45-1.50 (m, 1H), 1.73-1.75 (m, 1H), 1.92 (m, 1H), 2.03 (m, 1H), 2.36-2.50 (m, 2H), 2.67-2.69 (m, 1H), 3.71 (b, 1H), 4.81 (d,  $J= 9.0$  Hz, 1H), 7.15-7.20 (m, 2H), 7.44-7.49 (m, 2H);  $^{13}\text{C}$ -NMR (75 MHz,  $\text{CDCl}_3$ ):  $\delta$  (ppm) 18.416, 26.620, 33.190, 36.093, 38.145, 53.283, 74.263, 121.806, 128.614, 131.565, 140.067, 215.304; IR(KBr) 3371, 3023, 2963.6, 2933, 2911, 2872, 1700, 1590, 1455, 1059, 1006, 823  $\text{cm}^{-1}$ ; Enantiomeric excess: 96%, determined by HPLC (Daicel Chiralpak AS, i-PrOH/ Hexane= 30/ 70 ), UV 254 nm, flow rate 1.0 mL/min,  $t_{\text{Rmajor}}= 7.262$  min;  $t_{\text{Rminor}}= 10.747$  min; HR-MS for  $\text{C}_{14}\text{H}_{17}\text{Br}_1\text{O}_2+\text{Na}^+$ , calc: 319.0304, found : 319.0310.

**2-[(4-Chlorophenyl)hydroxymethyl]-4-methylcyclohexanone (3ah):** yield 70%;  $[\alpha]_{\text{D}}^{30} = -30.8$  ( $c= 0.5$ , Ethyl acetate ); mp: 102.7-104.5  $^{\circ}\text{C}$ ;  $^1\text{H}$ -NMR (300 MHz,  $\text{CDCl}_3$ ):  $\delta$  (ppm) 1.02 (d,  $J= 6.9$  Hz, 3H), 1.29-1.32 (m, 1H), 1.46-1.50 (m, 1H), 1.74-1.76 (m, 1H), 1.92 (m, 1H), 2.03 (m, 1H), 2.37-2.51 (m, 2H), 2.68-2.70 (m, 1H), 3.71 (b, 1H), 4.79 (d,  $J= 9$  Hz, 1H), 7.22-7.25 (m, 2H), 7.30-7.33 (m, 2H);  $^{13}\text{C}$ -NMR (75 MHz,  $\text{CDCl}_3$ ):  $\delta$  (ppm) 18.414, 26.630, 33.184, 36.103, 38.155, 53.319, 74.228, 128.273, 128.630, 133.661, 139.552, 215.339; IR(KBr) 3451, 3051, 2953, 2925, 2850, 1697, 1489, 1455, 832, 735  $\text{cm}^{-1}$ ; Enantiomeric excess: 96%, determined by HPLC (Daicel Chiralpak AS, i-PrOH/ Hexane= 30/ 70), UV 254 nm, flow rate 1.0 mL/min,  $t_{\text{Rmajor}}= 7.009$  min;  $t_{\text{Rminor}}= 10.091$  min; HR-MS for  $\text{C}_{14}\text{H}_{17}\text{Cl}_1\text{O}_2+\text{Na}^+$ , calc: 275.0809, found: 275.0822.

**2-[(3,5-Dibromophenyl)hydroxymethyl]-4-methylcyclohexanone (3ai):** yield 82%;  $[\alpha]_{\text{D}}^{30} =$

-24.4 (c= 0.5, Ethyl acetate );  $^1\text{H-NMR}$  (300 MHz,  $\text{CDCl}_3$ ):  $\delta$  (ppm) 1.08 (d,  $J$ = 6.9 Hz, 3H), 1.38 (m, 1H), 1.53-1.61 (m, 1H), 1.79-1.81 (m, 1H), 1.88-1.94 (m, 1H), 2.07-2.09 (m, 1H), 2.35-2.41 (m, 1H), 2.47-2.53 (m, 1H), 2.68 (m, 1H), 3.85 (b, 1H), 4.71 (d,  $J$ = 8.7 Hz, 1H), 7.39-7.40 (m, 2H), 7.58-7.60 (m, 1H);  $^{13}\text{C-NMR}$  (75 MHz,  $\text{CDCl}_3$ ):  $\delta$  (ppm) 18.256, 26.642, 32.953, 36.064, 38.130, 52.801, 73.922, 122.972, 128.837, 133.569, 145.065, 215.029; IR(Neat) 3428, 3071, 2953, 2927, 1868, 1703, 1584, 1556, 857, 740, 686  $\text{cm}^{-1}$ ; Enantiomeric excess: 96%, determined by HPLC (Daicel Chiralpak OJ-H, *i*-PrOH/ Hexane= 5/ 95), UV 254 nm, flow rate 1.0 mL/min;  $t_{\text{Rmajor}}$ = 8.731 min;  $t_{\text{Rminor}}$ = 10.084 min; HR-MS for  $\text{C}_{14}\text{H}_{16}\text{Br}_2\text{O}_2 + \text{Na}^+$ , calc: 396.9409, found: 396.9400.

**2-[(3,5-Bistrifluoromethylphenyl)hydroxymethyl]-4-methylcyclohexanone (3aj):** yield 55%;  $[\alpha]_{\text{D}}^{30}$  = -25.4 (c= 0.5, Ethyl acetate ); mp: 90.5-90.9  $^{\circ}\text{C}$ ;  $^1\text{H-NMR}$  (300 MHz,  $\text{CDCl}_3$ ):  $\delta$  (ppm) 1.07 (d,  $J$ = 6.9 Hz, 3H), 1.33 (m, 1H), 1.58-1.62 (m, 1H), 1.81-1.83 (m, 1H), 1.90-1.94 (m, 1H), 2.09-2.11 (m, 1H), 2.36-2.43 (m, 1H), 2.50-2.54 (m, 1H), 2.75-2.79 (m, 1H), 4.00 (b, 1H), 4.93 (d,  $J$ = 8.5 Hz, 1H), 7.78-7.82 (m, 3H);  $^{13}\text{C-NMR}$  (75 MHz,  $\text{CDCl}_3$ ):  $\delta$  (ppm) 18.027, 26.598, 32.764, 35.954, 38.085, 52.615, 74.050, 117.821 (q,  $J$ = 271.1 Hz); 121.931, 127.203, 131.040 (q,  $J$ = 33 Hz), 143.717, 214.860; IR(KBr) 3425, 2957, 2930, 2874, 1694, 1619, 1458, 1380, 1275, 1174, 1138, 898, 845, 680  $\text{cm}^{-1}$ ; Enantiomeric excess: 98%, determined by HPLC (Daicel Chiralpak AD, *i*-PrOH/ Hexane= 5/95), UV 254 nm, flow rate 1.0 mL/min,  $t_{\text{Rminor}}$ = 5.238 min;  $t_{\text{Rmajor}}$ = 11.863 min; HR-MS for  $\text{C}_{16}\text{H}_{16}\text{F}_6\text{O}_2 + \text{Na}^+$ , calc: 377.0947, found: 377.0951.

**2-[(2,6-Dichlorophenyl)hydroxymethyl]-4-methylcyclohexanone(3ak):** yield 95%;  $[\alpha]_{\text{D}}^{30}$  = -92.6 (c= 0.5, Ethyl acetate ); mp: 95.8-97.3  $^{\circ}\text{C}$ ;  $^1\text{H-NMR}$  (300 MHz,  $\text{CDCl}_3$ ):  $\delta$  (ppm) 1.06 (d,  $J$ = 6.9 Hz, 3H), 1.27-1.32 (m, 1H), 1.52-1.54 (m, 1H), 1.66-1.71 (m, 1H), 1.96-1.98 (m, 1H), 2.16-2.18 (m, 1H), 2.48-2.53 (m, 2H), 3.47 (d,  $J$ = 12 Hz, 1H), 3.54-3.57 (m, 1H), 5.83 (m, 1H), 7.13-7.19 (m, 1H), 7.25-7.33 (m, 2H);  $^{13}\text{C-NMR}$  (75 MHz,  $\text{CDCl}_3$ ):  $\delta$  (ppm) 18.882, 26.858, 33.523, 35.666, 38.470, 50.700, 70.760, 129.430, 134.942, 214.024; IR(KBr) 3405, 3082, 2959, 2933, 2905, 1703, 1580, 1559, 779, 763, 732,  $\text{cm}^{-1}$ ; Enantiomeric excess: >99%, determined by HPLC (Daicel Chiralpak OJ, *i*-PrOH/ Hexane= 5/95), UV 254 nm, flow rate: 1.0 mL/min;  $t_{\text{Rminor}}$ = 9.041 min;  $t_{\text{Rmajor}}$ = 9.782 min; HR-MS for  $\text{C}_{14}\text{H}_{16}\text{Cl}_2\text{O}_2 + \text{Na}^+$ , calc: 309.0420, found: 309.0419.

**2-(Hydroxyphenylmethyl)-4-methylcyclohexanone (3al):** yield 46%;  $[\alpha]_{\text{D}}^{30}$  = -43.8 (c= 0.5, Ethyl acetate); mp: 52.2-54  $^{\circ}\text{C}$ ;  $^1\text{H-NMR}$  (300MHz,  $\text{CDCl}_3$ ):  $\delta$  (ppm) 1.02 (d,  $J$ = 6.9 Hz, 3H), 1.30-1.34 (m, 1H), 1.52 (m, 1H), 1.70-1.74 (m, 1H), 1.94 (m, 1H), 2.04-2.06 (m, 1H), 2.43-2.52 (m, 2H), 2.75-2.78 (m, 1H), 4.84 (d,  $J$ = 9.3 Hz, 1H), 7.25-7.38 (m, 5H);  $^{13}\text{C-NMR}$  (75 MHz,  $\text{CDCl}_3$ ):  $\delta$

(ppm) 18.672, 26.729, 33.454, 36.291, 38.263, 53.705, 74.920, 126.927, 128.050, 128.512, 141.084, 215.446; IR(KBr) 3409, 3018, 3061, 2868, 2852, 1696, 1415, 1038, 742, 697 $\text{cm}^{-1}$ ; Enantiomeric excess: 94%, determined by HPLC (Daicel Chiralpak AS, i-PrOH/ Hexane= 30/70), UV 254 nm, flow rate 1.0 mL/min,  $t_{\text{Rmajor}}$ = 6.515 min;  $t_{\text{Rminor}}$ = 9.992 min; HR-MS for  $\text{C}_{16}\text{H}_{18}\text{F}_6\text{O}_2 + \text{Na}^+$ , calc: 241.1199, found: 241.1217.

**4-Ethyl-2-[hydroxy(4-nitrophenyl)methyl]cyclohexanone (3ba):** yield 90%;  $[\alpha]_{\text{D}}^{30} = -51.8$  (c= 0.5, Ethyl acetate ); mp: 120-122  $^{\circ}\text{C}$ ;  $^1\text{H}$ -NMR (300 MHz,  $\text{CDCl}_3$ ):  $\delta$  (ppm) 0.807 (d,  $J = 7.5$  Hz, 3H), 1.35-1.54 (m, 4H), 1.70-1.74 (m, 1H), 1.85-1.90 (m, 1H), 2.39-2.42 (m, 1H), 2.68 (m, 1H), 4.91 (d,  $J = 9$  Hz, 1H), 7.48-7.52 (m, 2H), 8.19-8.24 (m, 2H);  $^{13}\text{C}$ -NMR (75 MHz,  $\text{CDCl}_3$ ):  $\delta$  (ppm) 11.985, 24.725, 30.461, 33.517, 33.680, 38.380, 52.946, 74.164, 123.641, 127.815, 147.642, 148.356, 215.027; IR(KBr) 3497, 3109, 3074, 2968, 2924, 2848, 1700, 1605, 1595, 1516, 1342, 862  $\text{cm}^{-1}$ ; Enantiomeric excess: 99%, determined by HPLC (Daicel Chiralpak AS, i-PrOH/ Hexane= 30/ 70), UV 254 nm, flow rate 1.0 mL/min,  $t_{\text{Rmajor}}$ = 13.662 min;  $t_{\text{Rminor}}$ = 19.067 min; HR-MS for  $\text{C}_{15}\text{H}_{19}\text{N}_1\text{O}_4 + \text{Na}^+$ , calc: 300.1206, found: 300.1229.

**2-[Hydroxy(4-nitrophenyl)methyl]-4-propylcyclohexanone (3ca):** yield: 90%;  $[\alpha]_{\text{D}}^{30} = -36.4$  (c= 0.5, Ethyl acetate ); mp: 109-111  $^{\circ}\text{C}$ ;  $^1\text{H}$ -NMR (300 MHz,  $\text{CDCl}_3$ ):  $\delta$  (ppm) 0.86 (d,  $J = 6.9$  Hz, 3H), 1.16-1.38 (m, 5H), 1.50-1.58 (m, 1H), 1.84-1.88 (m, 3H), 2.40-2.47 (m, 2H), 2.69 (m, 1H), 3.93 (b, 1H), 4.91 (d,  $J = 8.7$  Hz, 1H), 7.47-7.51 (m, 2H), 8.19-8.22 (m, 2H);  $^{13}\text{C}$ -NMR (75 MHz,  $\text{CDCl}_3$ ):  $\delta$  (ppm) 14.047, 20.586, 30.733, 31.576, 33.991, 34.151, 38.371, 53.031, 74.117, 123.615, 127.794, 147.604, 148.378, 215.021; IR(KBr) 3487, 3108, 2949, 2926, 2867, 2853, 1702, 1605, 1521, 1344, 859, 838  $\text{cm}^{-1}$ ; Enantiomeric excess: 98%, determined by HPLC (Daicel Chiralpak AS, i-PrOH/ Hexane= 30/ 70), UV 254 nm, flow rate 1.0 mL/min,  $t_{\text{Rmajor}}$ = 10.529 min;  $t_{\text{Rminor}}$ = 13.668 min; HR-MS for  $\text{C}_{16}\text{H}_{21}\text{N}_1\text{O}_4 + \text{Na}^+$ , calc: 314.1363; found: 314.1360.

**4-tert-Butyl-2-[hydroxy(4-nitrophenyl)methyl]cyclohexanone (3da):** yield 52%;  $[\alpha]_{\text{D}}^{30} = -86.6$  (c= 0.5, Ethyl acetate ); mp: 178.1-179.9  $^{\circ}\text{C}$ ;  $^1\text{H}$ -NMR (300 MHz,  $\text{CDCl}_3$ ):  $\delta$  (ppm) 0.78 (s, 9H), 1.40-1.62 (m, 4H), 1.94-1.99 (m, 1H), 2.41-2.51 (m, 2H), 2.64-2.67 (m, 1H), 3.63 (b, 1H), 4.96 (d,  $J = 9$  Hz, 1H), 7.52-7.55 (m, 2H), 8.21-8.24 (m, 2H);  $^{13}\text{C}$ -NMR (75MHz,  $\text{CDCl}_3$ ):  $\delta$  (ppm) 24.113, 26.881, 26.992, 32.892, 39.314, 42.381, 54.283, 74.002, 123.705, 127.765, 147.753, 148.524, 215.814; IR(KBr) 3462, 2952, 2924, 2865, 1702, 1604, 1520, 1390, 1344, 1258, 1222, 854  $\text{cm}^{-1}$ ; Enantiomeric excess: 93%, determined by HPLC (Daicel Chiralpak AD, i-PrOH/ Hexane= 15/ 85),

UV 254 nm, flow rate 1.0 mL/min,  $t_{R\text{minor}} = 7.93$  min;  $t_{R\text{major}} = 17.47$  min; HR-MS for  $C_{17}H_{23}N_1O_4 + Na^+$ , calc: 328.1519, found: 328.1507.

**2-[Hydroxy(4-nitrophenyl)methyl]-4-phenylcyclohexanone (3ea):** yield: 74%;  $[\alpha]_D^{30} = -48.2$  (c= 0.5, Ethyl acetate); mp: 140.5-141.7 °C;  $^1H$ -NMR (300 MHz,  $CDCl_3$ ):  $\delta$  (ppm) 1.79-1.84 (m, 1H), 1.94-1.96 (m, 1H), 2.19 (m, 1H), 2.35-2.40 (m, 1H), 2.53-2.58 (m, 2H), 2.76-2.79 (m, 1H), 3.16-3.17 (m, 1H), 3.70 (d,  $J = 3.0$  Hz, 1H), 5.05 (dd,  $J_1 = 3$  Hz,  $J_2 = 8.8$  Hz, 1H), 7.12-7.15 (m, 2H), 7.22-7.26 (m, 1H), 7.28-7.33 (m, 2H), 7.51-7.54 (m, 2H), 8.21-8.24 (m, 2H);  $^{13}C$ -NMR (75 MHz,  $CDCl_3$ ):  $\delta$  (ppm) 31.041, 34.056, 36.725, 39.052, 53.983, 73.907, 123.745, 126.355, 126.660, 127.786, 128.791, 142.198, 147.671, 148.200, 213.944; IR(KBr) 3380, 3034, 2941, 2918, 2887, 1703, 1604, 1515, 1399, 1055, 847, 772  $cm^{-1}$ ; Enantiomeric excess: 94%, determined by HPLC (Daicel Chiralpak AD, i-PrOH/ Hexane= 20/ 80), UV 254 nm, flow rate 1.0 mL/min,  $t_{R\text{minor}} = 15.697$  min;  $t_{R\text{major}} = 22.640$  min; HR-MS for  $C_{19}H_{19}N_1O_4 + Na^+$ , calc: 348.1206, found: 348.1208.

**General procedure for the synthesis of 2-arylidene-4-methylcyclohexanones:** The crude product of the enantioselective desymmetrization was dissolved in anhydrous Dichloromethane (5 ml), then TsCl (0.2 ml), triethylamine (1.0 ml), and DMAP (5 mg) were added at 0 °C. The mixture was stirred at 0°C for 30 minute and then refluxed for 2 days at 40 °C. The reaction was quenched with water (10 ml). The resultant mixture was extracted with ethyl acetate and the combined organic layers were dried over anhydrous  $MgSO_4$ . After removal of the solvent, the residue was purified through flash column chromatography on a silica gel to give the corresponding dehydroxylation products.

**2-(2-Fluoro-benzylidene)4-methylcyclohexanone (7):** yield: 60%;  $[\alpha]_D^{30} = +136.2$  (c= 0.5,  $CH_3CO_2Et$ ); mp: 81.7-82.5 °C;  $^1H$ -NMR (300 MHz,  $CDCl_3$ ):  $\delta$  (ppm) 1.03 (d,  $J = 6.3$  Hz, 3H), 1.60-1.62 (m, 1H), 1.82-1.88 (m, 1H), 1.92-2.00 (m, 1H), 2.23-2.24 (m, 1H), 2.44-2.50 (m, 1H), 2.61-2.64 (m, 1H), 2.83-2.88 (m, 1H), 7.05-7.16 (m, 2H), 7.26-7.34 (m, 2H), 7.45 (s, 1H);  $^{13}C$ -NMR (75 MHz,  $CDCl_3$ ):  $\delta$  (ppm) 21.564, 30.269, 31.498, 37.302, 39.366, 115.505 (d,  $J = 21.8$  Hz), 123.620, 127.907, 130.144, 130.675, 138.295, 159.138(d,  $J = 248.8$  Hz), 201.323; IR(KBr) 3076, 2952, 2927, 2881, 1686, 1613, 1600, 1572, 1451, 1140, 755  $cm^{-1}$ ; Enantiomeric excess: 99%, determined by HPLC (Daicel Chiralpak AS, i-PrOH/ Hexane= 30/ 70), UV 254 nm, flow rate 1.0 mL/min,  $t_{R\text{minor}} = 5.571$  min;  $t_{R\text{major}} = 6.135$  min; HR-MS for  $C_{14}H_{15}F_1O_1 + Na^+$ , calc: 241.0999, found: 241.0983.

**The synthesis of 7-[Hydroxy(4-nitrophenyl)methyl]-5-methyloxepan-2-one (8):** To solution of **3aa** (131 mg, 0.5 mmol) in anhydrous Dichloromethane (5 ml) were added NaHCO<sub>3</sub> (87 mg) and m-CPBA (270 mg, 1.5mmol). The reaction mixture was stirred at 25 °C until the reaction was complete (monitored by TLC). The reaction was quenched with saturated aqueous Na<sub>2</sub>S<sub>2</sub>O<sub>3</sub> (10 ml). The mixture was extracted with ethyl acetate and the combined organic layers were dried over anhydrous MgSO<sub>4</sub>. After removal of solvent, the residue was purified through flash column chromatography on a silica gel (eluent: Petroleum: Ethyl acetate= 2:1) to give the **8** as a white solid in 81% yield.  $[\alpha]_D^{30} = -9.2$  (c= 0.5, Ethyl acetate ); mp: 148.9-149.4 °C; <sup>1</sup>H-NMR (300 MHz, CDCl<sub>3</sub>): δ (ppm) 0.90 (d, *J*= 6.9 Hz, 3H), 1.30-1.34 (m, 1H), 1.574-1.59 (m, 1H), 1.75-1.83 (m, 2H), 2.01-2.03 (m, 1H), 2.54-2.59 (m, 1H), 2.77-2.82 (m, 1H), 4.44-4.51 (m, 1H), 4.78 (d, *J*= 6.9 Hz, 1H), 7.57-7.60 (m, 2H), 8.21-8.24 (m, 2H); <sup>13</sup>C-NMR (75 MHz, CDCl<sub>3</sub>): δ (ppm) 18.894, 27.829, 27.937, 30.007, 36.129, 75.443, 78.731, 123.704, 128.234, 146.244, 147.943, 174.231; IR(KBr) 3383, 3105, 3075.0, 2942, 2889, 1707, 1604, 1596, 1517, 1465, 1344, 1161, 859 cm<sup>-1</sup>; Enantiomeric excess: 98%, determined by HPLC (Daicel Chiralpak AS, i-PrOH/ Hexane= 30/ 70 ), UV 254 nm, flow rate 1.0 mL/min, *t*<sub>Rmajor</sub>= 9.307 min; *t*<sub>Rminor</sub>= 10.938 min; HR-MS for C<sub>14</sub>H<sub>17</sub>N<sub>1</sub>O<sub>5</sub> +Na<sup>+</sup>, calc: 302.0999, found: 302.1099.

**The synthesis of 6,7-Dihydroxy-4-methyl-7-(4-nitrophenyl)heptanoic acid ethyl ester (9):** After a solution of **8** (50 mg, 0.18mmol) and EtONa (2.5 mg) in ethanol (3 ml) was stirred at room temperature for 1 hour, water (5 ml) was added to quench the reaction. The reaction mixture was extracted with ethyl acetate and the combined organic layers were dried over anhydrous MgSO<sub>4</sub>. After removal of solvent, the residue was purified through flash column chromatography on a silica gel (eluent: Petroleum: Ethyl acetate= 2:1) to give the **9** as a colorless oil in 90% yield.  $[\alpha]_D^{30} = -2.2$  (c= 0.5, Ethyl acetate ); <sup>1</sup>H-NMR (300 MHz, CDCl<sub>3</sub>): δ (ppm) 0.99 (d, *J*= 6.6 Hz, 3H), 1.07-1.16 (m, 2H), 1.24 (t, *J*= 7.2 Hz, 3H), 1.39-1.48 (m, 2H), 1.61-1.64 (m, 1H), 1.69-1.80 (m, 1H), 2.26-2.32 (m, 2H), 3.82-3.87 (m, 1H), 4.07-4.15 (q, 2H), 4.55 (d, *J*= 6 Hz, 1H), 7.53-7.56 (m, 2H), 8.19-8.22 (m, 2H); <sup>13</sup>C-NMR (75 MHz, CDCl<sub>3</sub>): δ (ppm) 14.159, 20.333, 28.628, , 29.354, 31.396, 39.946, 60.688, 73.233, 76.934, 123.574, 127.792, 147.601, 148.620, 174.709; IR(Neat) 3440, 3127, 3076, 2955, 2871, 1715, 1604, 1519, 1462, 1347, 1191, 1105, 855 cm<sup>-1</sup>; Enantiomeric excess: 97%, determined by HPLC (Daicel Chiralpak OD, i-PrOH/ Hexane= 15/ 85 ), UV 254 nm, flow rate: 1.0 mL/min, *t*<sub>Rmajor</sub>= 9.408 min; *t*<sub>Rminor</sub>= 15.382 min; HR-MS for C<sub>16</sub>H<sub>23</sub>N<sub>1</sub>O<sub>6</sub> +Na<sup>+</sup>, calc: 348.1418,

found: 348.1419.

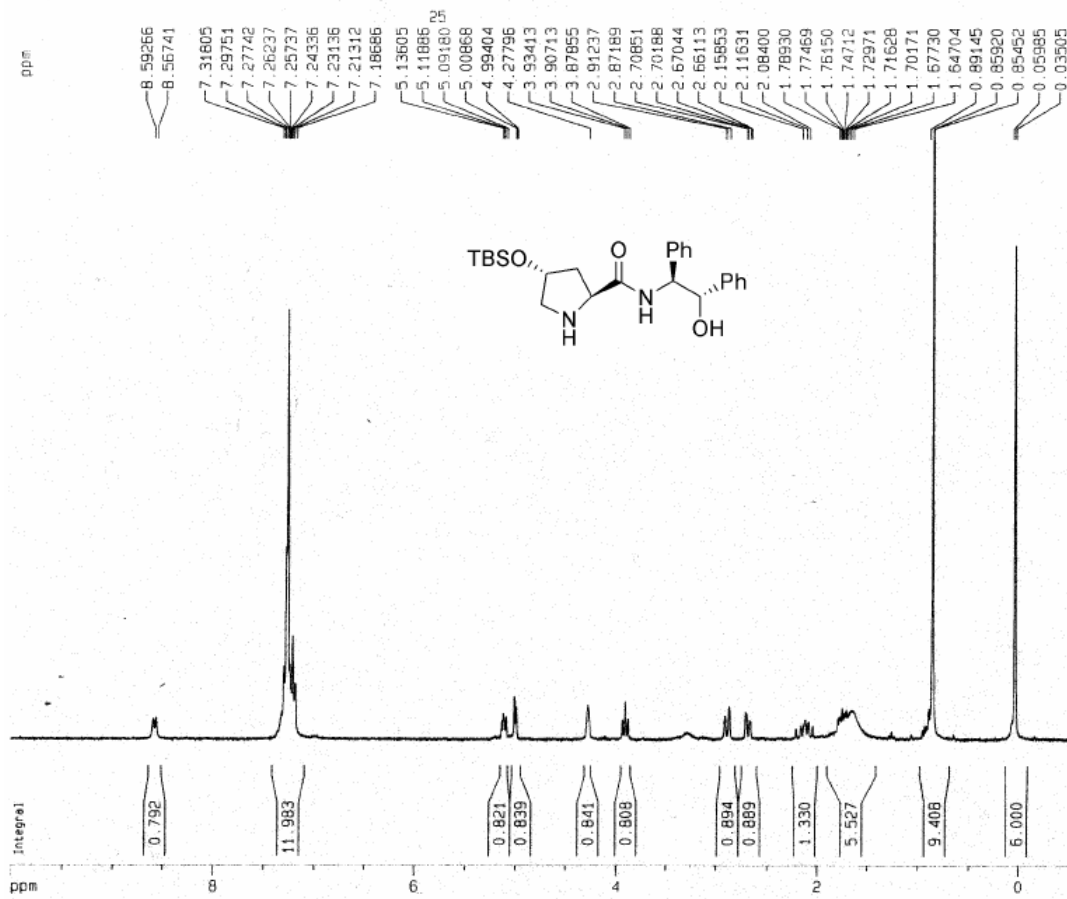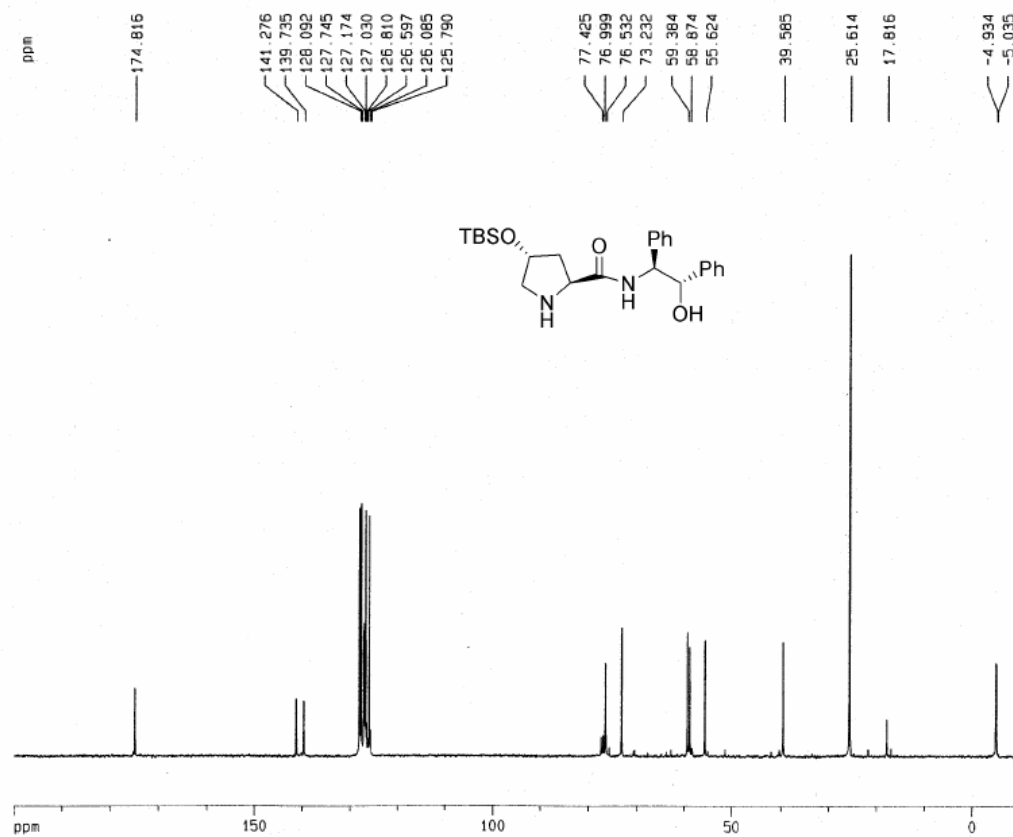

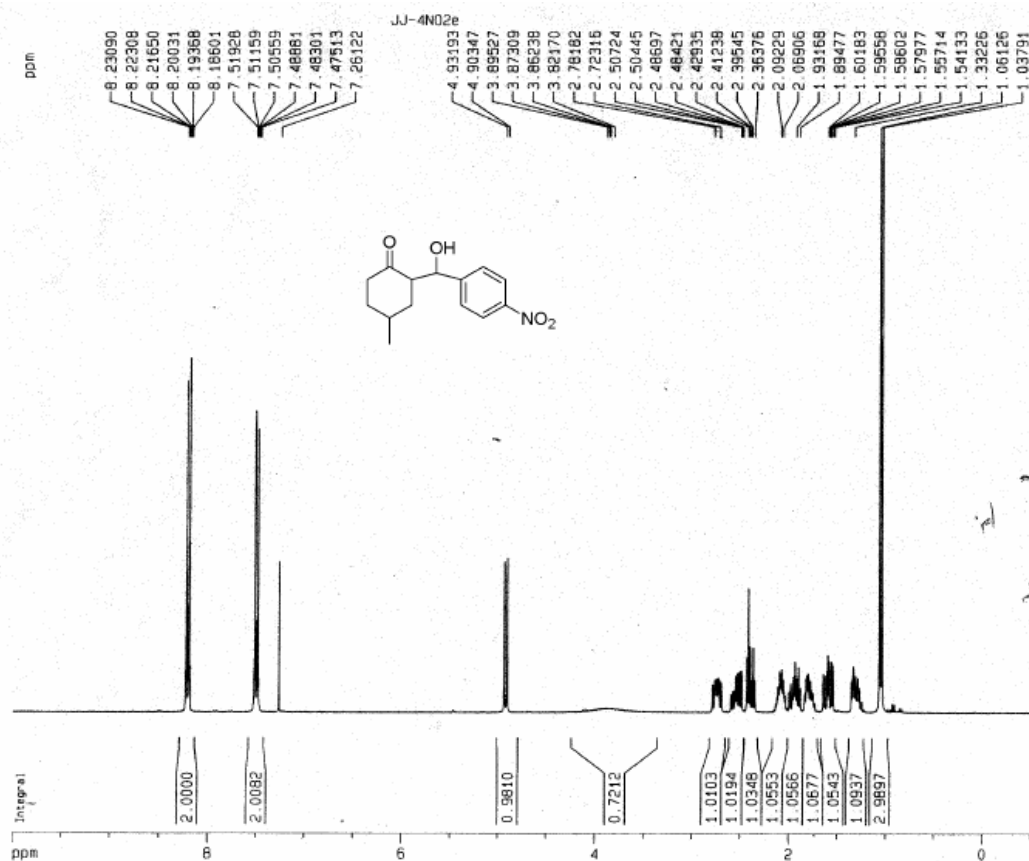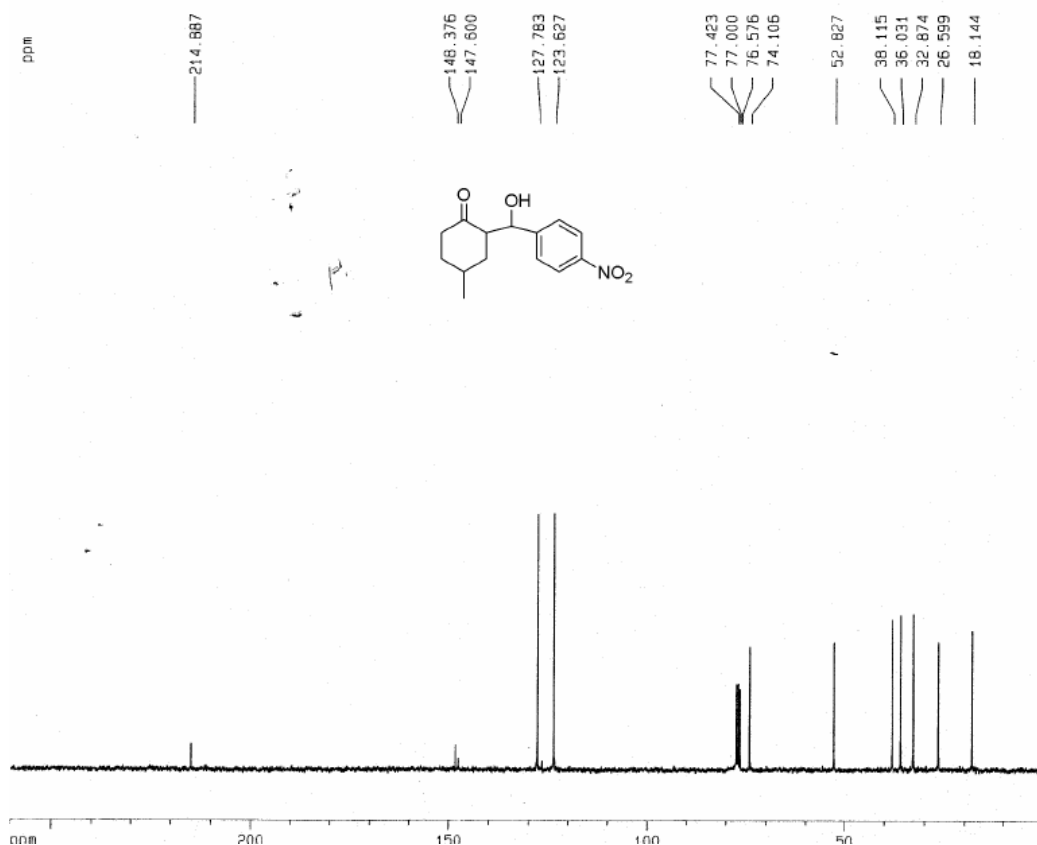

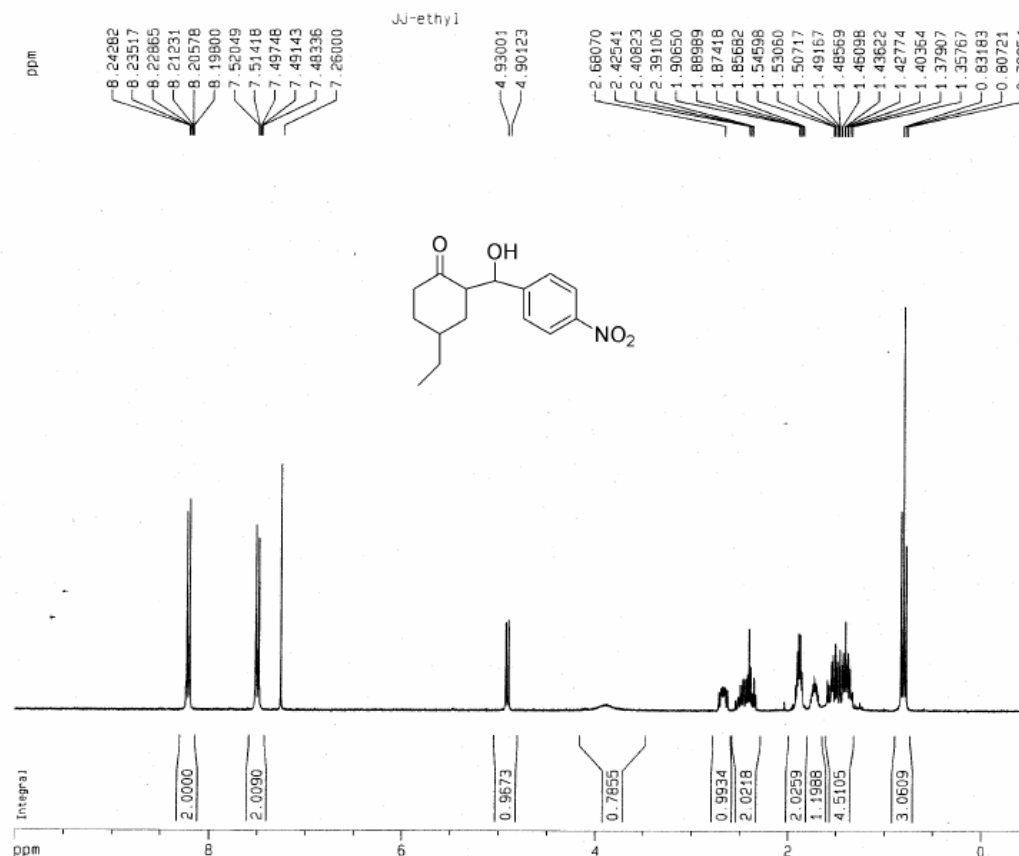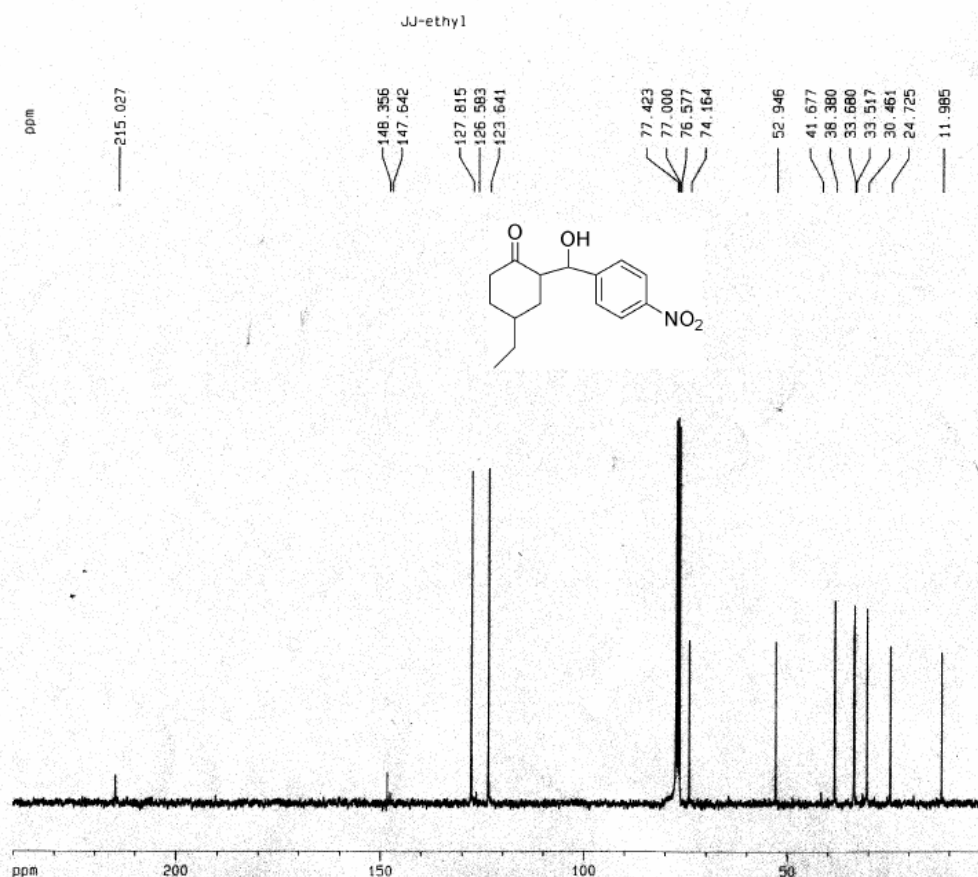

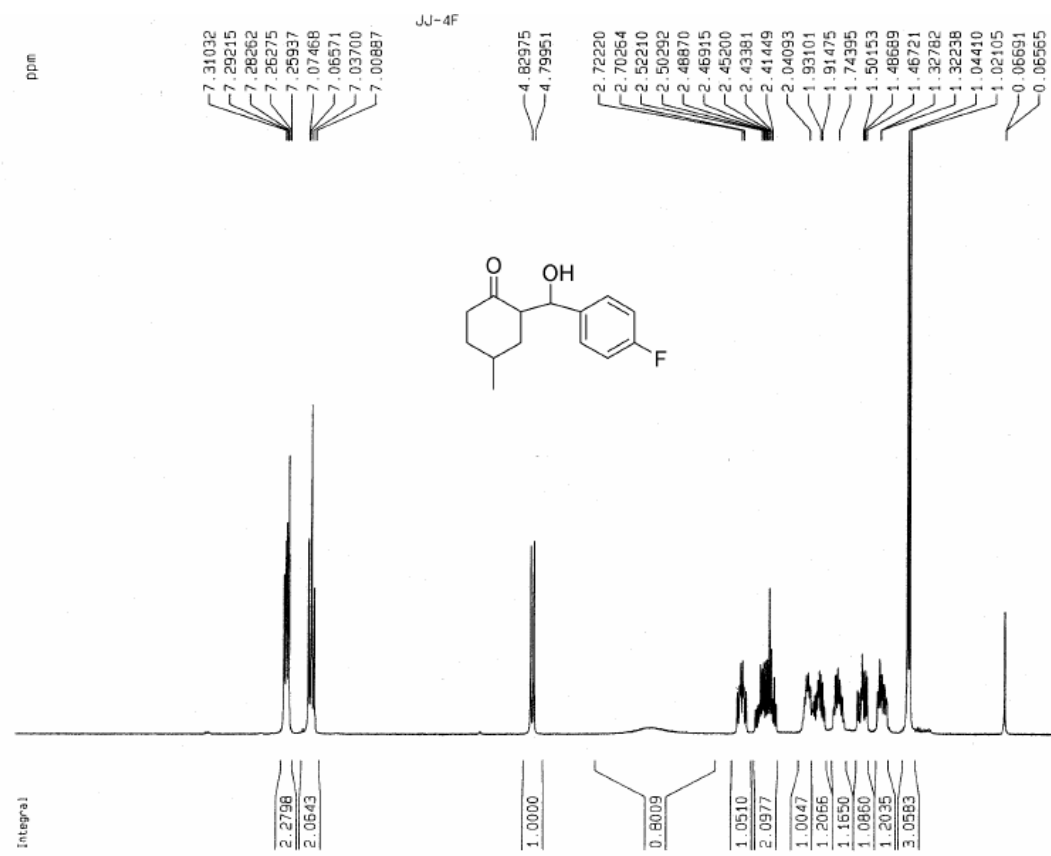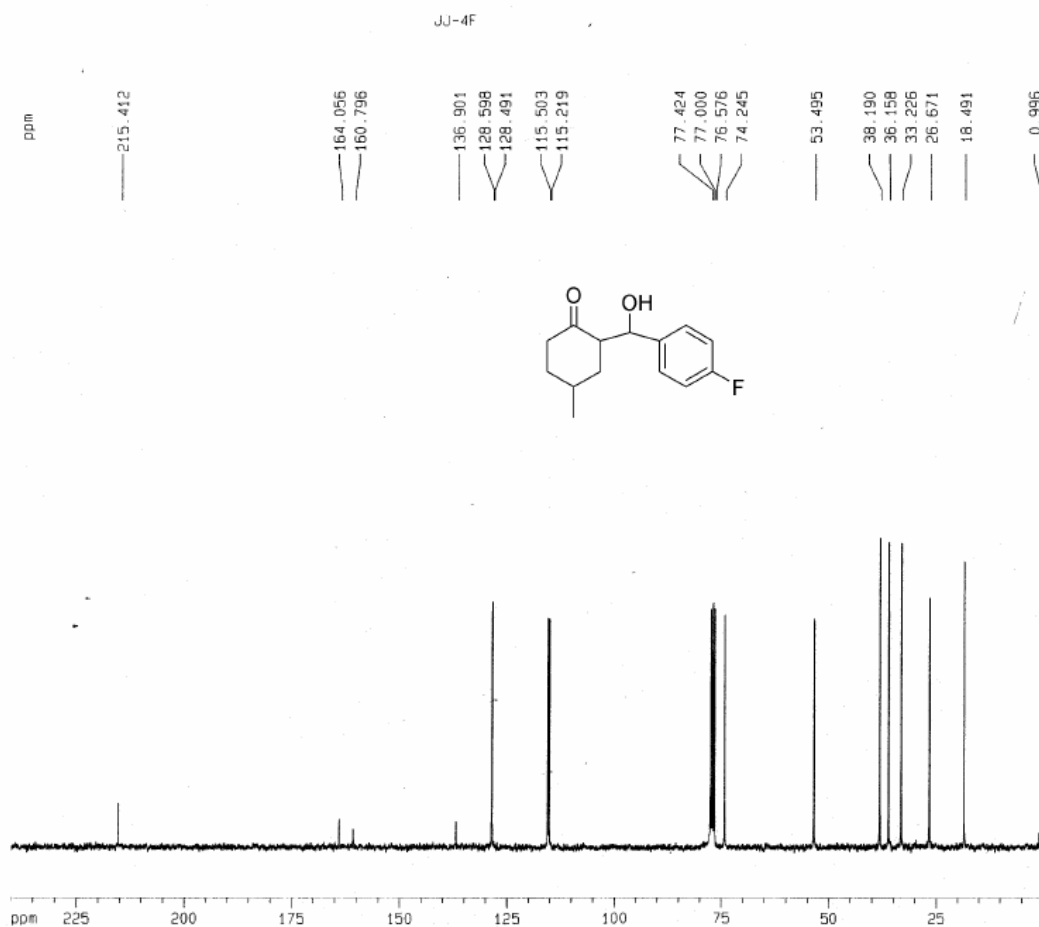

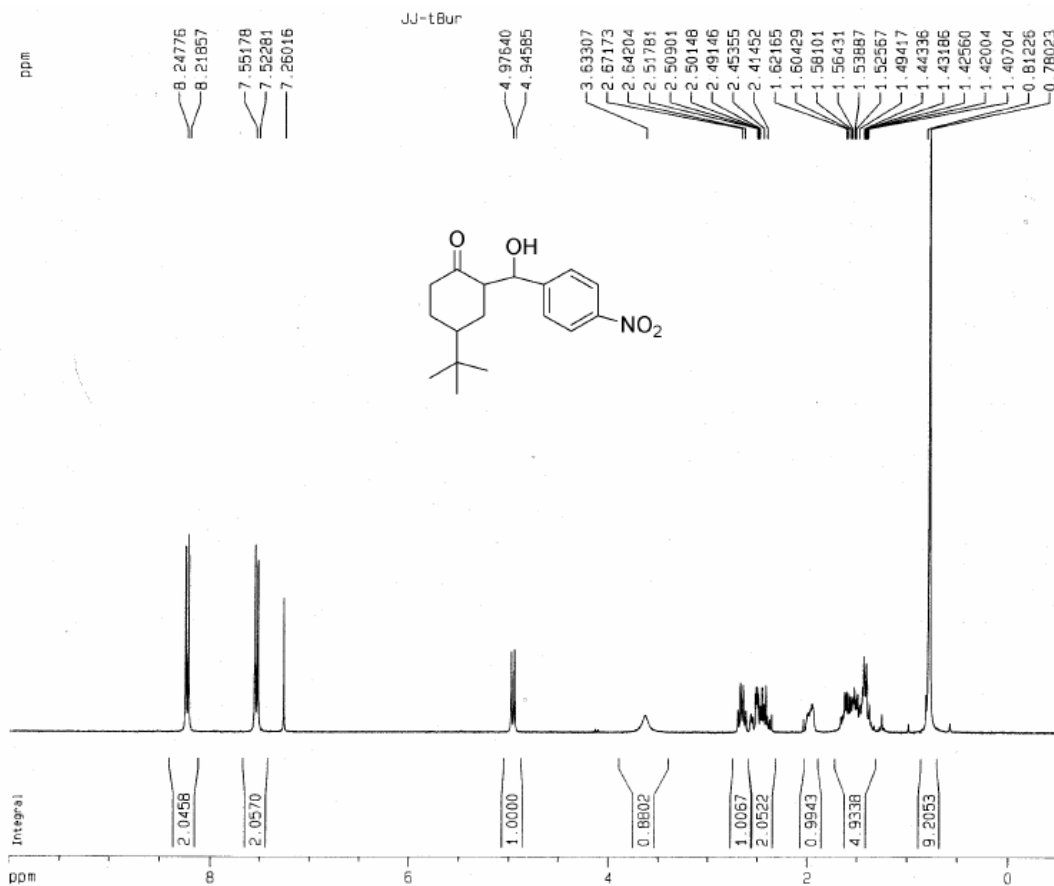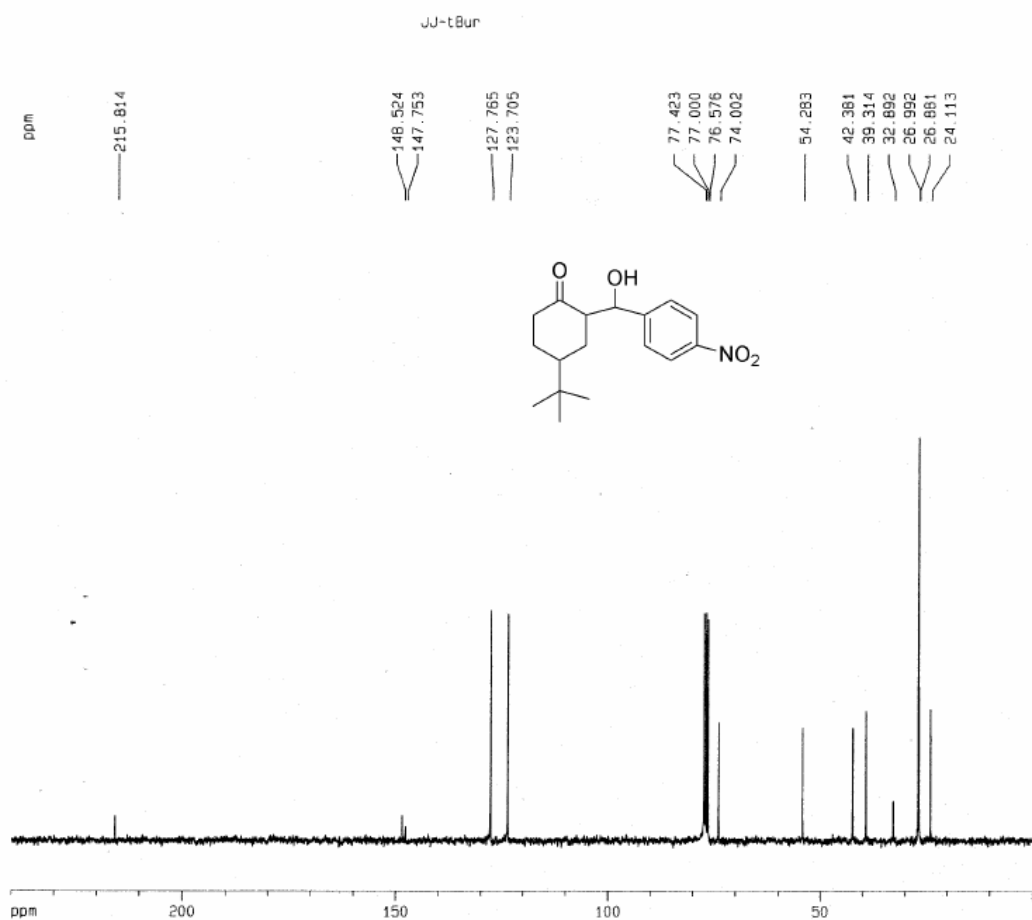

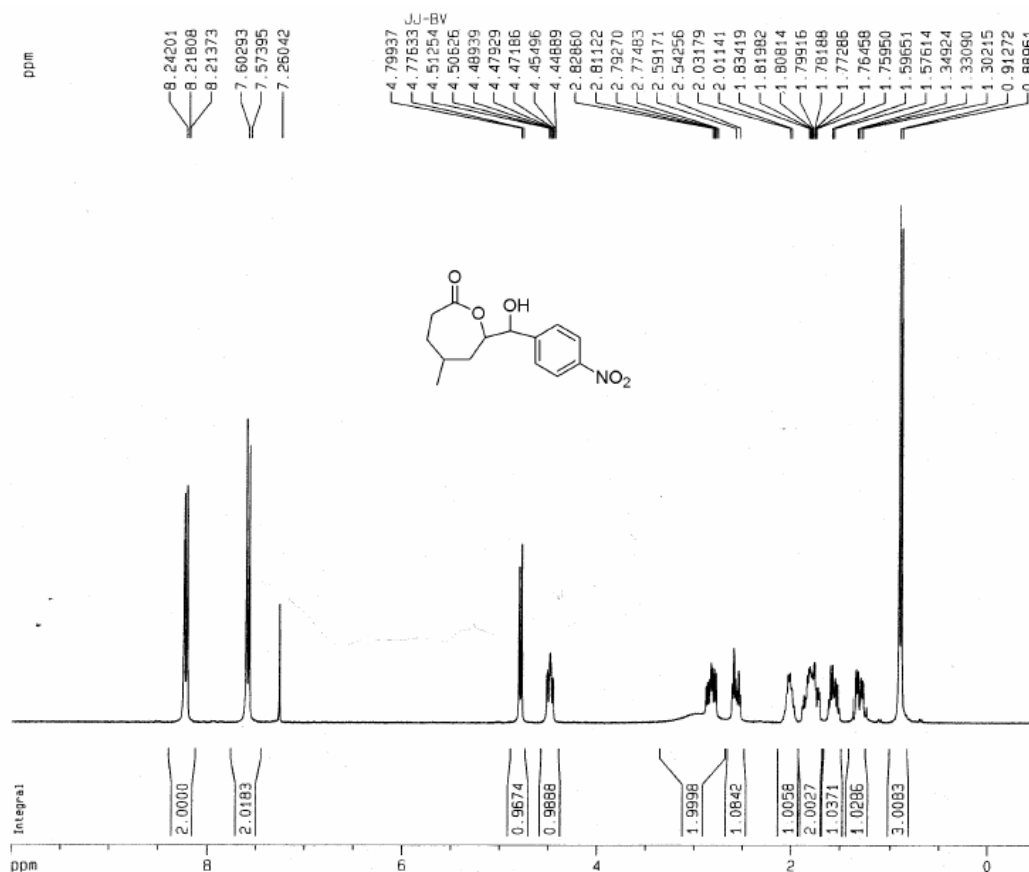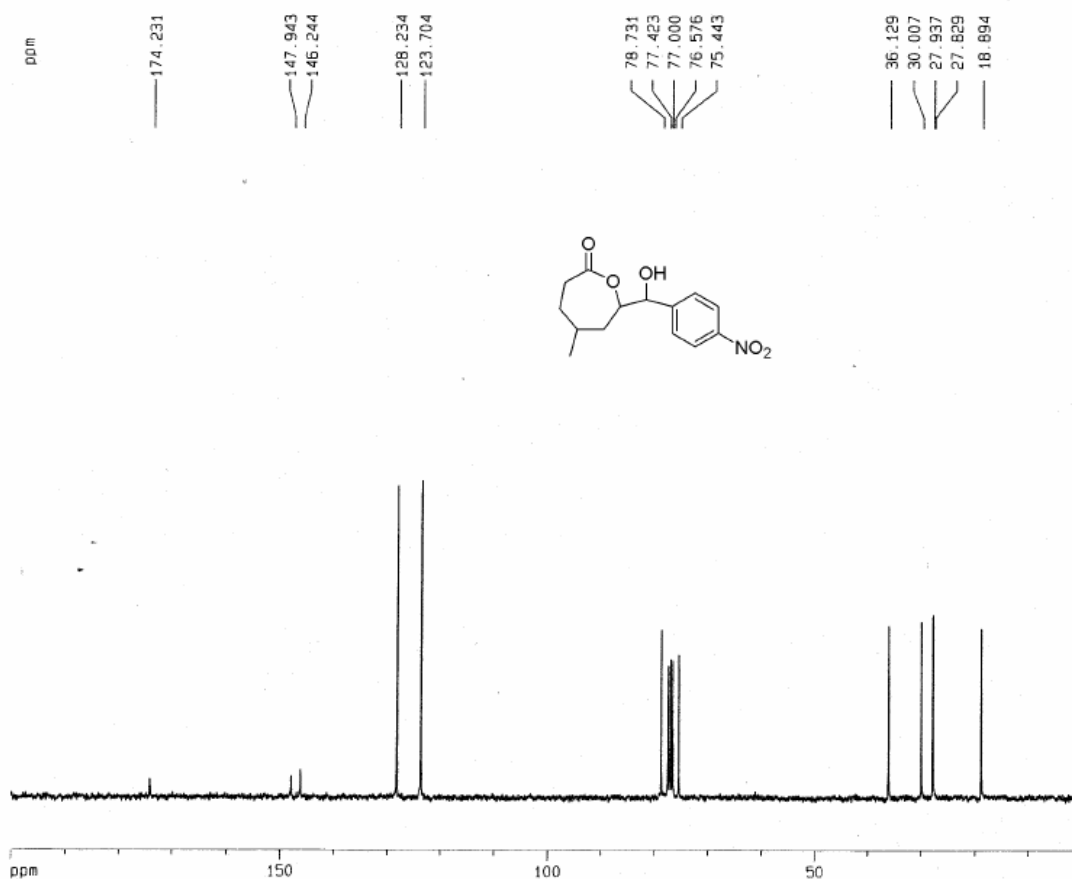

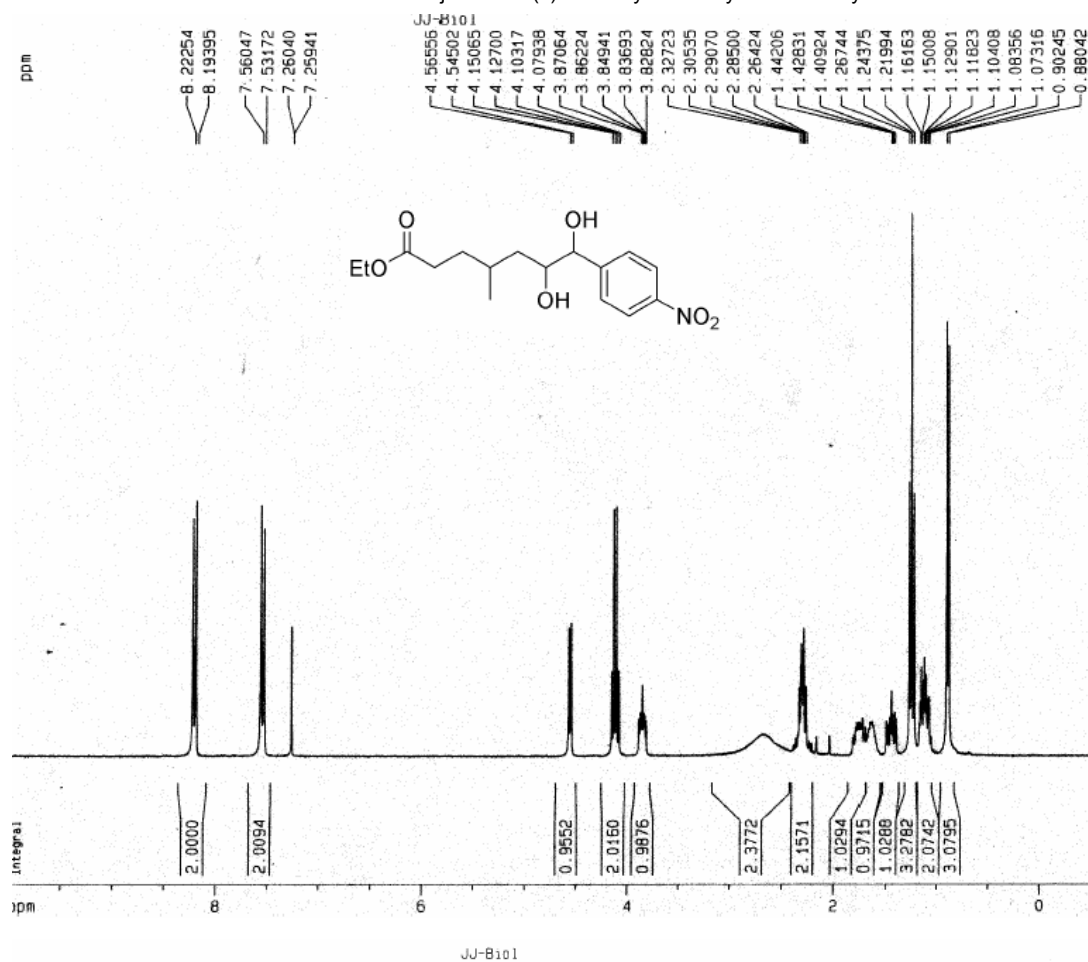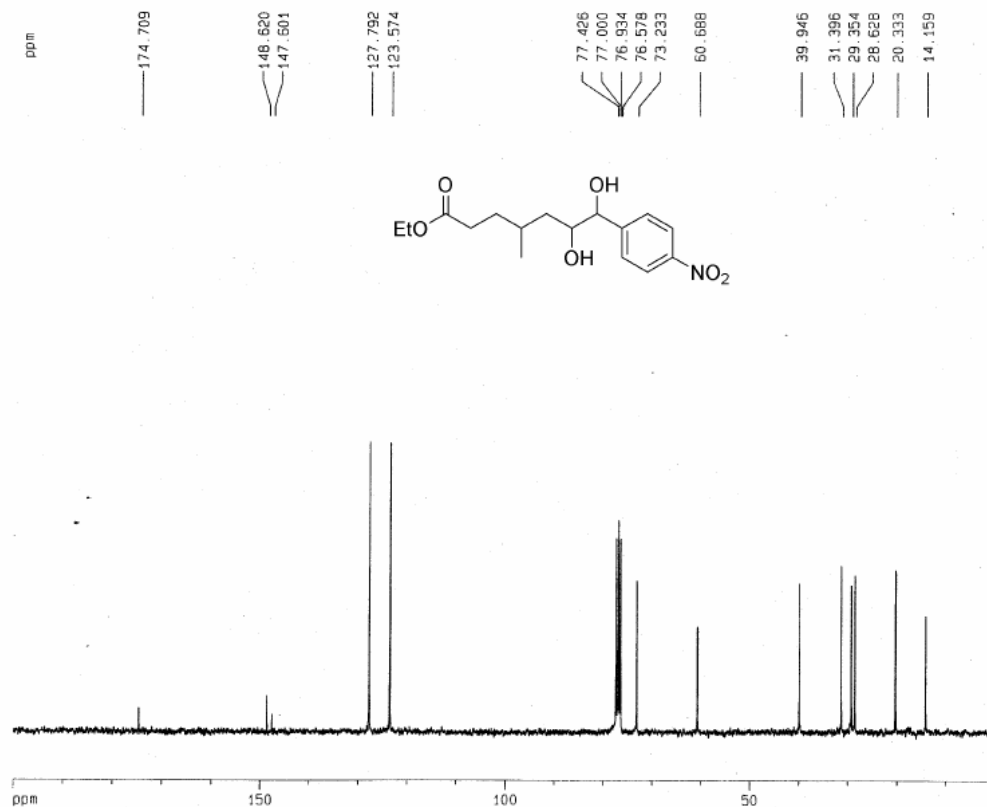

ulas  
Project Name: Defaults  
Reported by User: System

*Breeze*

| SAMPLE INFORMATION |               |                  |                      |
|--------------------|---------------|------------------|----------------------|
| Sample Name:       | JJ-0          | Acquired By:     | System               |
| Sample Type:       | Unknown       | Date Acquired:   | 11/19/05 11:09:20 AM |
| Vial:              | 1             | Acq. Method:     | 100A                 |
| Injection #:       | 1             | Date Processed:  | 11/19/05 11:25:06 AM |
| Injection Volume:  | 20.00 ul      | Channel Name:    | 2487Channel 1        |
| Run Time:          | 50.00 Minutes | Sample Set Name: |                      |

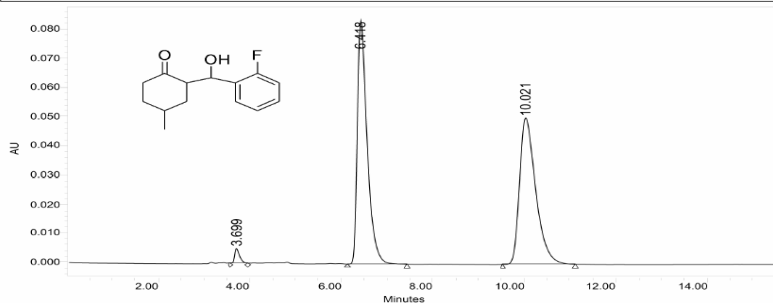

|   | RT (min) | Area (V*sec) | % Area | Height (V) | % Height |
|---|----------|--------------|--------|------------|----------|
| 1 | 3.699    | 41540        | 1.64   | 5190       | 3.73     |
| 2 | 6.418    | 1243820      | 49.25  | 83576      | 60.08    |
| 3 | 10.021   | 1239975      | 49.10  | 50339      | 36.19    |

Report Method: Untitled

Printed 4:33:18 PM 8/15/06

Page: 1 of 1

ulas  
Project Name: Defaults  
Reported by User: System

*Breeze*

| SAMPLE INFORMATION |               |                  |                      |
|--------------------|---------------|------------------|----------------------|
| Sample Name:       | JJ-           | Acquired By:     | System               |
| Sample Type:       | Unknown       | Date Acquired:   | 11/19/05 11:26:06 AM |
| Vial:              | 1             | Acq. Method:     | 100A                 |
| Injection #:       | 2             | Date Processed:  | 11/19/05 11:39:13 AM |
| Injection Volume:  | 20.00 ul      | Channel Name:    | 2487Channel 1        |
| Run Time:          | 50.00 Minutes | Sample Set Name: |                      |

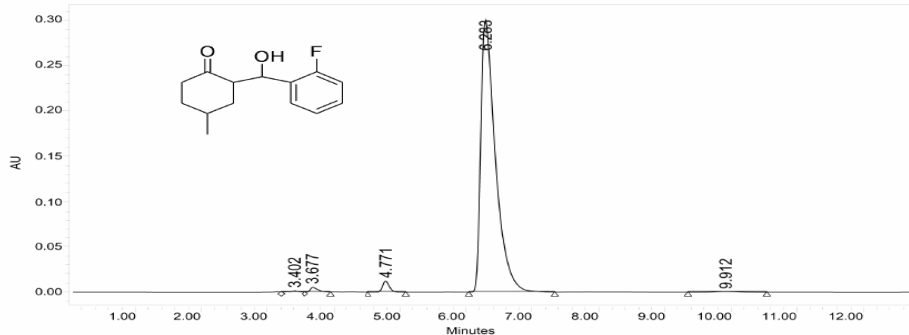

|   | RT (min) | Area (V*sec) | % Area | Height (V) | % Height |
|---|----------|--------------|--------|------------|----------|
| 1 | 3.402    | 10601        | 0.22   | 1195       | 0.37     |
| 2 | 3.677    | 38157        | 0.80   | 5224       | 1.63     |
| 3 | 4.771    | 86245        | 1.80   | 12169      | 3.80     |
| 4 | 6.283    | 4626640      | 96.77  | 300741     | 93.94    |
| 5 | 9.912    | 19603        | 0.41   | 829        | 0.26     |

Report Method: Untitled

Printed 4:33:42 PM 8/15/06

Page: 1 of 1

ulas  
Project Name: Defaults  
Reported by User: System

Breeze

# SAMPLE INFORMATION

|                   |               |                  |                   |
|-------------------|---------------|------------------|-------------------|
| Sample Name:      | JJ-0          | Acquired By:     | System            |
| Sample Type:      | Unknown       | Date Acquired:   | 1/6/06 9:37:32 AM |
| Vial:             | 1             | Acq. Method:     | 100A              |
| Injection #:      | 3             | Date Processed:  | 1/6/06 9:50:41 AM |
| Injection Volume: | 20.00 ul      | Channel Name:    | 2487Channel 1     |
| Run Time:         | 50.00 Minutes | Sample Set Name: |                   |

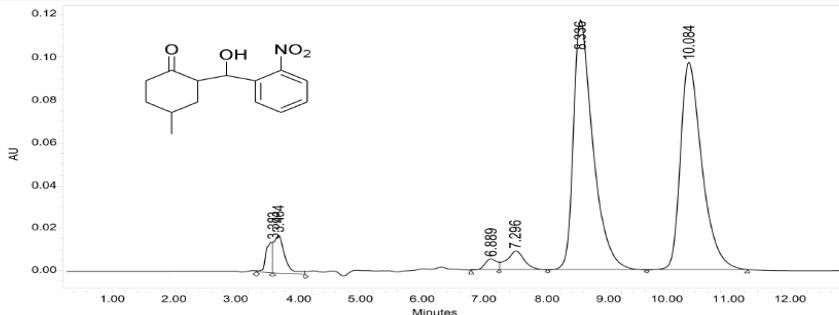

|   | RT (min) | Area (V*sec) | % Area | Height (V) | % Height |
|---|----------|--------------|--------|------------|----------|
| 1 | 3.383    | 115943       | 2.12   | 14409      | 5.55     |
| 2 | 3.464    | 212277       | 3.88   | 17709      | 6.82     |
| 3 | 6.889    | 69690        | 1.27   | 5122       | 1.97     |
| 4 | 7.296    | 172189       | 3.14   | 8766       | 3.38     |
| 5 | 8.336    | 2564417      | 46.83  | 116825     | 44.98    |
| 6 | 10.084   | 2341691      | 42.76  | 96877      | 37.30    |

Report Method: Untitled

Printed 4:31:48 PM 8/15/06

Page: 1 of 1

ulas  
Project Name: Defaults  
Reported by User: System

Breeze

# SAMPLE INFORMATION

|                   |               |                  |                    |
|-------------------|---------------|------------------|--------------------|
| Sample Name:      | JJ            | Acquired By:     | System             |
| Sample Type:      | Unknown       | Date Acquired:   | 1/6/06 9:54:12 AM  |
| Vial:             | 4             | Acq. Method:     | 100A               |
| Injection #:      | 4             | Date Processed:  | 1/6/06 10:08:06 AM |
| Injection Volume: | 20.00 ul      | Channel Name:    | 2487Channel 1      |
| Run Time:         | 50.00 Minutes | Sample Set Name: |                    |

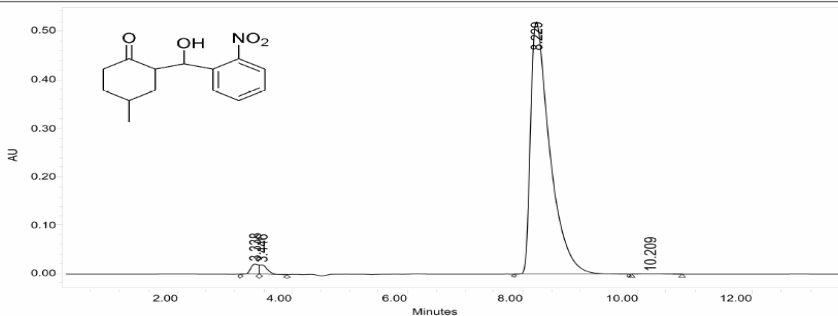

|   | RT (min) | Area (V*sec) | % Area | Height (V) | % Height |
|---|----------|--------------|--------|------------|----------|
| 1 | 3.338    | 216873       | 1.73   | 21926      | 3.89     |
| 2 | 3.446    | 207064       | 1.65   | 20446      | 3.63     |
| 3 | 8.229    | 12125765     | 96.51  | 520418     | 92.36    |
| 4 | 10.209   | 14728        | 0.12   | 680        | 0.12     |

Report Method: Untitled

Printed 4:32:23 PM 8/15/06

Page: 1 of 1

ulas  
Project Name: Defaults  
Reported by User: System

Breeze

| SAMPLE INFORMATION |               |                  |                    |
|--------------------|---------------|------------------|--------------------|
| Sample Name:       | jj-0          | Acquired By:     | System             |
| Sample Type:       | Unknown       | Date Acquired:   | 12/2/05 6:35:21 PM |
| Vial:              | 1             | Acq. Method:     | 100A               |
| Injection #:       | 3             | Date Processed:  | 12/2/05 7:03:40 PM |
| Injection Volume:  | 20.00 ul      | Channel Name:    | 2487Channel 1      |
| Run Time:          | 40.00 Minutes | Sample Set Name: |                    |

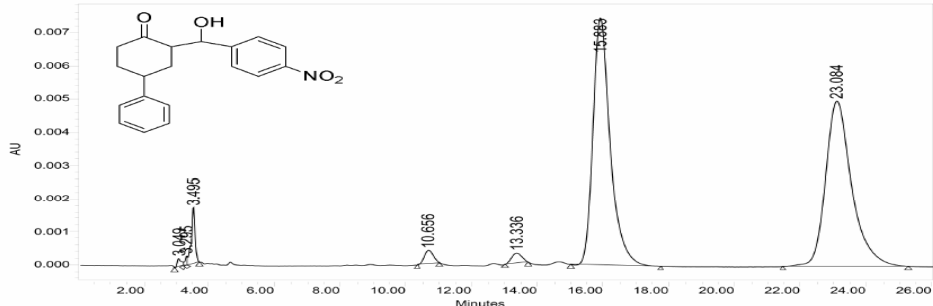

|   | RT (min) | Area (V*sec) | % Area | Height (V) | % Height |
|---|----------|--------------|--------|------------|----------|
| 1 | 3.049    | 2434         | 0.42   | 257        | 1.67     |
| 2 | 3.295    | 1682         | 0.29   | 283        | 1.84     |
| 3 | 3.495    | 13480        | 2.32   | 1691       | 10.98    |
| 4 | 10.656   | 7978         | 1.37   | 414        | 2.69     |
| 5 | 13.336   | 6745         | 1.16   | 307        | 1.99     |
| 6 | 15.883   | 272618       | 46.93  | 7456       | 48.42    |
| 7 | 23.084   | 275969       | 47.51  | 4992       | 32.42    |

Report Method: Untitled

Printed 4:29:34 PM 8/15/06

Page: 1 of 1

ulas  
Project Name: Defaults  
Reported by User: System

Breeze

| SAMPLE INFORMATION |               |                  |                     |
|--------------------|---------------|------------------|---------------------|
| Sample Name:       | JJ            | Acquired By:     | System              |
| Sample Type:       | Unknown       | Date Acquired:   | 12/23/05 4:52:43 PM |
| Vial:              | 1             | Acq. Method:     | 100A                |
| Injection #:       | 1             | Date Processed:  | 12/23/05 5:19:20 PM |
| Injection Volume:  | 20.00 ul      | Channel Name:    | 2487Channel 1       |
| Run Time:          | 45.00 Minutes | Sample Set Name: |                     |

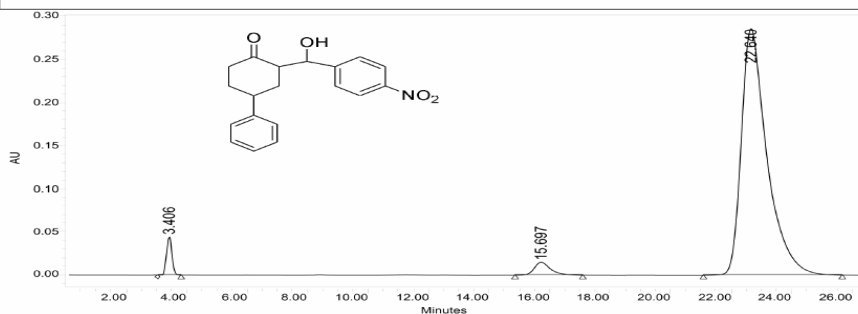

|   | RT (min) | Area (V*sec) | % Area | Height (V) | % Height |
|---|----------|--------------|--------|------------|----------|
| 1 | 3.406    | 544129       | 3.03   | 44233      | 12.79    |
| 2 | 15.697   | 561781       | 3.13   | 15071      | 4.36     |
| 3 | 22.640   | 16851565     | 93.84  | 286669     | 82.86    |

Report Method: Untitled

Printed 4:30:55 PM 8/15/06

Page: 1 of 1

ulas  
Project Name: Defaults  
Reported by User: System

*Breeze*

# SAMPLE INFORMATION

|                   |               |                  |                    |
|-------------------|---------------|------------------|--------------------|
| Sample Name:      | JJ-0          | Acquired By:     | System             |
| Sample Type:      | Unknown       | Date Acquired:   | 5/18/06 6:31:01 PM |
| Vial:             | 1             | Acq. Method:     | 100A               |
| Injection #:      | 1             | Date Processed:  | 5/18/06 6:49:32 PM |
| Injection Volume: | 20.00 ul      | Channel Name:    | 2487Channel 1      |
| Run Time:         | 40.00 Minutes | Sample Set Name: |                    |

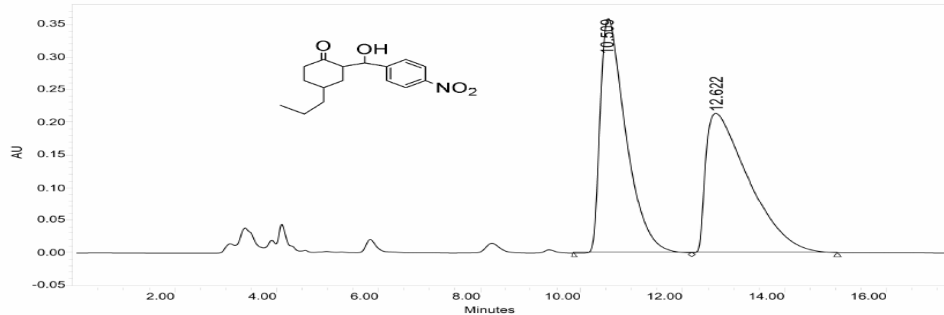

|   | RT<br>(min) | Area<br>(V*sec) | % Area | Height<br>(V) | % Height |
|---|-------------|-----------------|--------|---------------|----------|
| 1 | 10.509      | 12627281        | 50.08  | 359991        | 62.71    |
| 2 | 12.622      | 12588560        | 49.92  | 214079        | 37.29    |

Report Method: Untitled

Printed 4:25:54 PM 8/15/06

Page: 1 of 1

ulas  
Project Name: Defaults  
Reported by User: System

*Breeze*

# SAMPLE INFORMATION

|                   |               |                  |                    |
|-------------------|---------------|------------------|--------------------|
| Sample Name:      | JJ-           | Acquired By:     | System             |
| Sample Type:      | Unknown       | Date Acquired:   | 5/19/06 2:44:10 PM |
| Vial:             | 1             | Acq. Method:     | 100A               |
| Injection #:      | 1             | Date Processed:  | 5/19/06 3:00:25 PM |
| Injection Volume: | 20.00 ul      | Channel Name:    | 2487Channel 1      |
| Run Time:         | 40.00 Minutes | Sample Set Name: |                    |

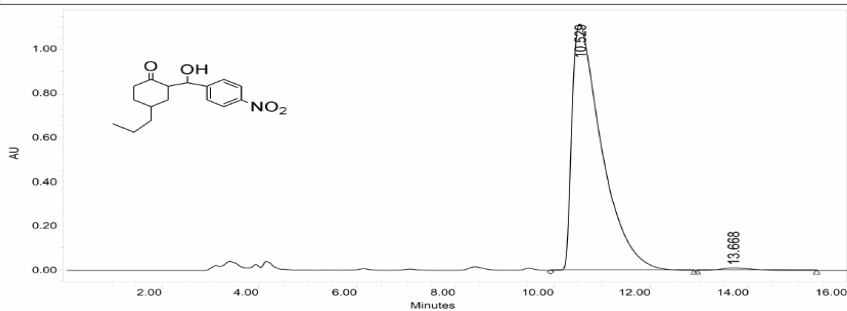

|   | RT<br>(min) | Area<br>(V*sec) | % Area | Height<br>(V) | % Height |
|---|-------------|-----------------|--------|---------------|----------|
| 1 | 10.529      | 46878394        | 99.03  | 1114915       | 99.04    |
| 2 | 13.668      | 461088          | 0.97   | 10779         | 0.96     |

Report Method: Untitled

Printed 4:28:14 PM 8/15/06

Page: 1 of 1

ulas  
Project Name: Defaults  
Reported by User: System

*Breeze*

### SAMPLE INFORMATION

|                   |               |                  |                    |
|-------------------|---------------|------------------|--------------------|
| Sample Name:      | JJ-0          | Acquired By:     | System             |
| Sample Type:      | Unknown       | Date Acquired:   | 7/4/06 11:23:08 AM |
| Vial:             | 1             | Acq. Method:     | 100A               |
| Injection #:      | 2             | Date Processed:  | 7/4/06 11:36:47 AM |
| Injection Volume: | 20.00 ul      | Channel Name:    | 2487Channel 1      |
| Run Time:         | 40.00 Minutes | Sample Set Name: |                    |

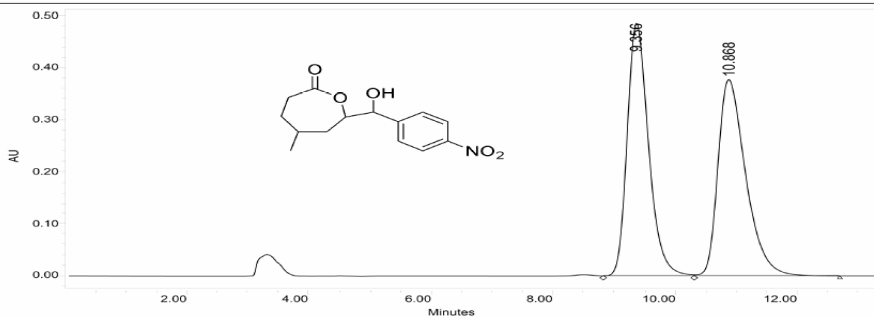

|   | RT<br>(min) | Area<br>(V*sec) | % Area | Height<br>(V) | % Height |
|---|-------------|-----------------|--------|---------------|----------|
| 1 | 9.356       | 11881637        | 49.84  | 486823        | 56.25    |
| 2 | 10.868      | 11959451        | 50.16  | 378623        | 43.75    |

Report Method: Untitled

Printed 4:39:54 PM 8/15/06

Page: 1 of 1

ulas  
Project Name: Defaults  
Reported by User: System

*Breeze*

### SAMPLE INFORMATION

|                   |               |                  |                    |
|-------------------|---------------|------------------|--------------------|
| Sample Name:      | JJ            | Acquired By:     | System             |
| Sample Type:      | Unknown       | Date Acquired:   | 7/4/06 11:37:28 AM |
| Vial:             | 1             | Acq. Method:     | 100A               |
| Injection #:      | 3             | Date Processed:  | 7/4/06 11:53:44 AM |
| Injection Volume: | 20.00 ul      | Channel Name:    | 2487Channel 1      |
| Run Time:         | 40.00 Minutes | Sample Set Name: |                    |

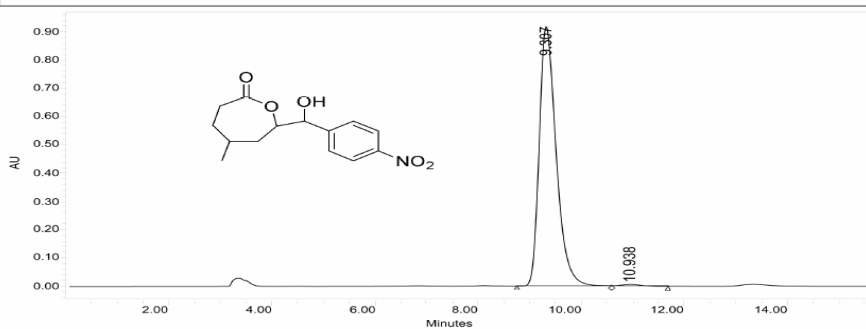

|   | RT<br>(min) | Area<br>(V*sec) | % Area | Height<br>(V) | % Height |
|---|-------------|-----------------|--------|---------------|----------|
| 1 | 9.307       | 20991489        | 99.19  | 918920        | 99.31    |
| 2 | 10.938      | 171128          | 0.81   | 6340          | 0.69     |

Report Method: Untitled

Printed 4:40:15 PM 8/15/06

Page: 1 of 1

ulas  
Project Name: Defaults  
Reported by User: System

7/6/06

| SAMPLE INFORMATION |               |                  |                   |  |  |
|--------------------|---------------|------------------|-------------------|--|--|
| Sample Name:       | JJ-0          | Acquired By:     | System            |  |  |
| Sample Type:       | Unknown       | Date Acquired:   | 7/6/06 1:25:54 PM |  |  |
| Vial:              | 1             | Acq. Method:     | 100A              |  |  |
| Injection #:       | 1             | Date Processed:  | 7/6/06 2:17:55 PM |  |  |
| Injection Volume:  | 20.00 ul      | Channel Name:    | 2487Channel 1     |  |  |
| Run Time:          | 60.00 Minutes | Sample Set Name: |                   |  |  |

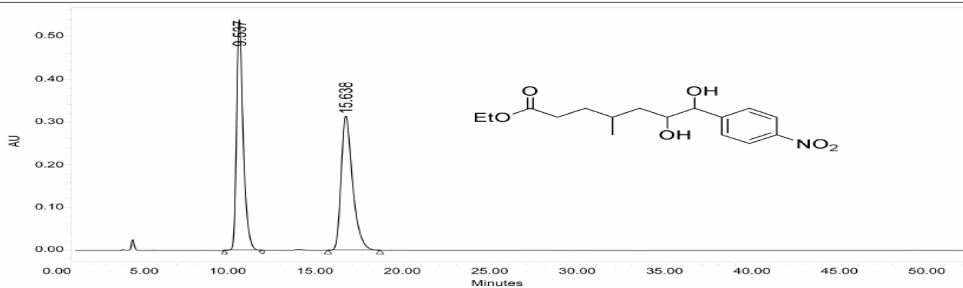

|   | RT (min) | Area (V*sec) | % Area | Height (V) | % Height |
|---|----------|--------------|--------|------------|----------|
| 1 | 9.537    | 14386608     | 50.04  | 537631     | 63.11    |
| 2 | 15.638   | 14362599     | 49.96  | 314197     | 36.89    |

Report Method: Untitled

Printed 4:38:35 PM 8/15/06

Page: 1 of 1

ulas  
Project Name: Defaults  
Reported by User: System

7/6/06

| SAMPLE INFORMATION |               |                  |                   |  |  |
|--------------------|---------------|------------------|-------------------|--|--|
| Sample Name:       | JJ            | Acquired By:     | System            |  |  |
| Sample Type:       | Unknown       | Date Acquired:   | 7/6/06 2:21:15 PM |  |  |
| Vial:              | 1             | Acq. Method:     | 100A              |  |  |
| Injection #:       | 2             | Date Processed:  | 7/6/06 2:41:17 PM |  |  |
| Injection Volume:  | 20.00 ul      | Channel Name:    | 2487Channel 1     |  |  |
| Run Time:          | 40.00 Minutes | Sample Set Name: |                   |  |  |

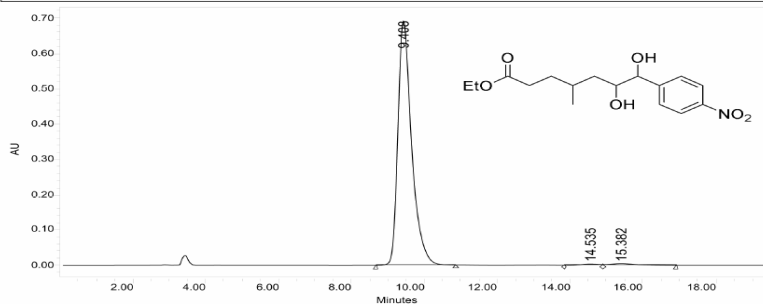

|   | RT (min) | Area (V*sec) | % Area | Height (V) | % Height |
|---|----------|--------------|--------|------------|----------|
| 1 | 9.408    | 18156562     | 98.05  | 693844     | 98.85    |
| 2 | 14.535   | 121050       | 0.65   | 3338       | 0.48     |
| 3 | 15.382   | 240801       | 1.30   | 4737       | 0.67     |

Report Method: Untitled

Printed 4:39:17 PM 8/15/06

Page: 1 of 1
